# Supplementary material for: The influence of metal centres on the exchange interaction in heterometallic complexes with oxalate-bridged cations
Source: Royal Society of Chemistry journal article supplement (doi:10.1039/c7dt02522j), 2017-01-01
Supplement: c7dt02522j1.pdf [file c7dt02522j1.pdf]

Electronic Supplementary Information for

## Influence of the metal centres on the exchange interaction in heterometallic complexes with oxalate-bridged cations

Lidija Androš Dubraja,<sup>a</sup> Marijana Jurić,<sup>a</sup> Filip Torić<sup>b</sup> and Damir Pajić<sup>b</sup>

<sup>a</sup>*Ruđer Bošković Institute, Bijenička cesta 54, 10000 Zagreb, Croatia*

<sup>b</sup>*Department of Physics, Faculty of Science, University of Zagreb, Bijenička cesta 32, 10000 Zagreb, Croatia*

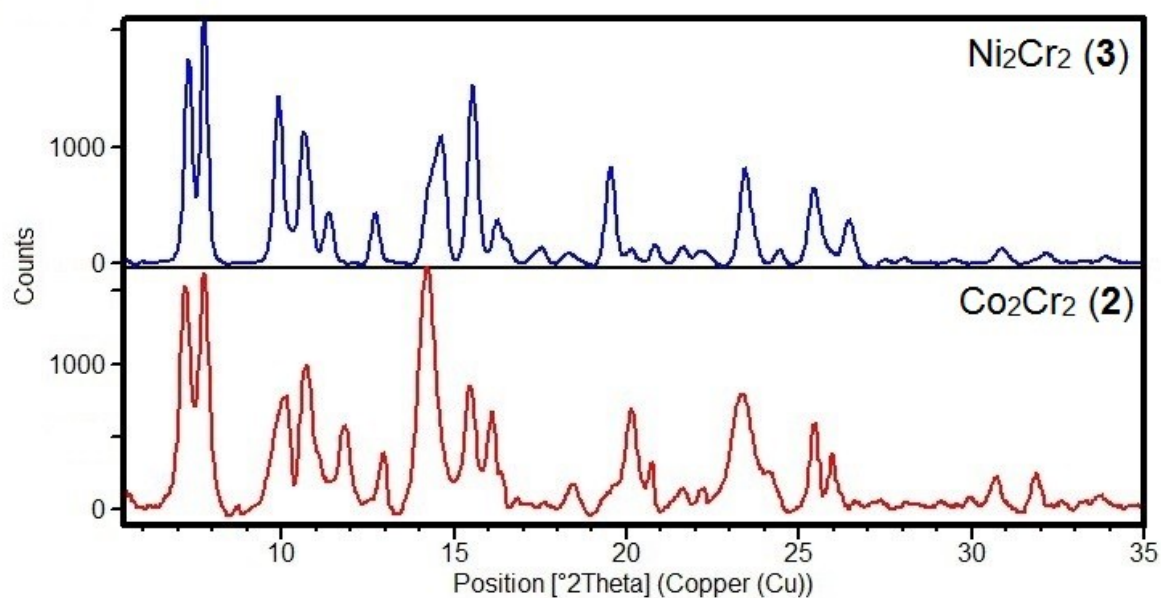

**Figure S1** The X-ray powder diffraction patterns of  $\text{Co}_2\text{Cr}_2$  (**2**) and  $\text{Ni}_2\text{Cr}_2$  (**3**) were recorded on an Oxford Xcalibur Nova R diffractometer with a micro-focus tube using  $\text{CuK}\alpha$  radiation. The samples were placed in a 0.3 mm diameter capillary.

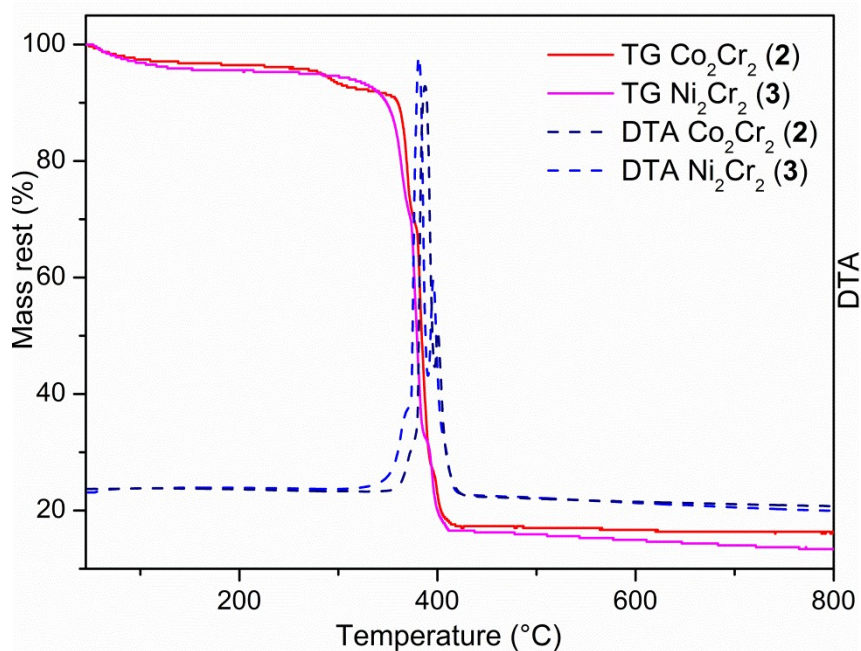

**Figure S2** The TG and DTA curves for compounds  $\text{Co}_2\text{Cr}_2$  (**2**) and  $\text{Ni}_2\text{Cr}_2$  (**3**) measured in the synthetic air atmosphere

**Table S1.** Thermoanalytical data for compounds  $\text{Co}_2\text{Cr}_2$  (**2**) and  $\text{Ni}_2\text{Cr}_2$  (**3**)

| Compound                              | $\Delta t$ (°C) | Mass loss (%) |              |                                         | $t(\text{DTA}_{\text{max}})$ (°C) |
|---------------------------------------|-----------------|---------------|--------------|-----------------------------------------|-----------------------------------|
|                                       |                 | <i>exp.</i>   | <i>calc.</i> | <i>elimination</i>                      |                                   |
| $\text{Co}_2\text{Cr}_2$ ( <b>2</b> ) | 60–140          | 3.81          | 3.97         | $2\text{H}_2\text{O}$                   | -                                 |
|                                       | 140–390         | 59.05         | 59.56        | 3phen                                   | 387 egzo                          |
|                                       | 390–600         | 20.64         | 19.83        | $2.5\text{CO}_2$                        | 400 egzo                          |
|                                       | residue         | 16.50         | 16.64        | $\text{CoO} + 1/2\text{Cr}_2\text{O}_3$ | -                                 |
| $\text{Ni}_2\text{Cr}_2$ ( <b>3</b> ) | 60–150          | 3.56          | 3.97         | $2\text{H}_2\text{O}$                   | -                                 |
|                                       | 150–385         | 60.52         | 59.58        | 3phen                                   | 381 egzo                          |
|                                       | 385–600         | 18.76         | 19.84        | $2.5\text{CO}_2$                        | 396 egzo                          |
|                                       | residue         | 16.16         | 16.61        | $\text{NiO} + 1/2\text{Cr}_2\text{O}_3$ | -                                 |

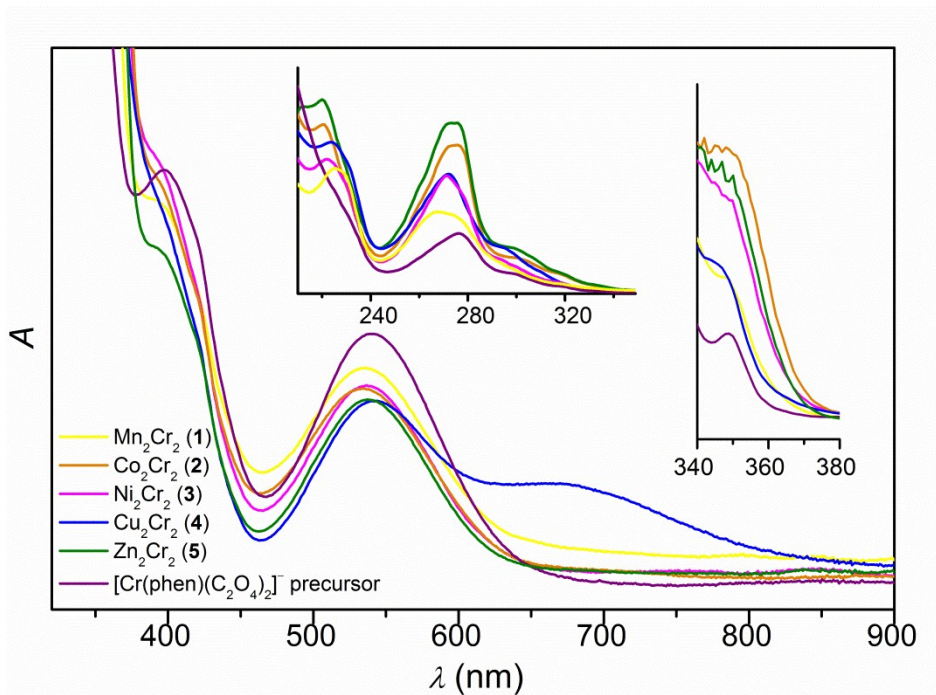

**Figure S3.** Electronic spectra of compounds **1–5** and  $[\text{Cr}(\text{phen})(\text{C}_2\text{O}_4)_2]^-$  precursor complex obtained from aqueous solutions for  $c(\text{Cr}^{3+}) = 1 \times 10^{-3}$  (main plot, visible light region),  $1 \times 10^{-4}$  (right inset, 340–380 nm region) and  $1 \times 10^{-5}$  (left inset; 220–320 nm region)  $\text{mol dm}^{-3}$ .

## Elemental analysis data and absorption bands in the IR spectrum:

Anal. Calcd for  $C_{41}H_{28}MnCrN_6O_{12}$ ;  $Mn_2Cr_2$  (1): C, 54.50; H, 3.12; N, 9.30. Found: C, 54.37; H, 3.02; N, 9.11%.

IR (KBr,  $cm^{-1}$ ): 3446 (m, br), 3061 (w), 2925 (w), 1715 (vs), 1705 (vs), 1681 (vs), 1642 (vs), 1516 (m), 1425 (s), 1376 (m), 1361 (s), 1224 (m), 1145 (w), 1101 (w), 854 (m), 806 (m), 793 (m), 725 (s), 668 (m), 549 (m), 437 (w), 416 (m), 395 (m).

Anal. Calcd for  $C_{41}H_{28}CoCrN_6O_{12}$ ;  $Co_2Cr_2$  (2): C, 54.26; H, 3.11; N, 9.26. Found: C, 54.57; H, 3.12; N, 9.01%.

IR (KBr,  $cm^{-1}$ ): 3446 (m, br), 3061 (w), 2925 (w), 1715 (vs), 1705 (vs), 1681 (vs), 1642 (vs), 1516 (m), 1425 (s), 1376 (m), 1361 (s), 1224 (m), 1145 (w), 1101 (w), 854 (m), 806 (m), 793 (m), 725 (s), 668 (m), 549 (m), 437 (w), 416 (m), 395 (m).

Anal. Calcd for  $C_{41}H_{28}NiCrN_6O_{12}$ ;  $Ni_2Cr_2$  (3): C, 54.27; H, 3.11; N, 9.26. Found: C, 54.88; H, 3.07; N, 9.16%.

IR (KBr,  $cm^{-1}$ ): 3446 (m, br), 3061 (w), 2924 (w), 1714 (vs), 1705 (vs), 1681 (vs), 1639 (vs), 1517 (m), 1426 (s), 1377 (m), 1361 (s), 1224 (m), 1144 (w), 1105 (w), 854 (m), 806 (m), 799 (m), 726 (s), 644 (m), 549 (m), 437 (w), 415 (m), 393 (m).

Anal. Calcd for  $C_{41}H_{28}CuCrN_6O_{12}$ ;  $Cu_2Cr_2$  (4): C, 53.98; H, 3.09; N, 9.21. Found: C, 54.41; H, 3.02; N, 9.44%.

IR (KBr,  $cm^{-1}$ ): 3443 (vs, br), 3058 (w), 2921 (w), 1715 (vs), 1704 (vs), 1680 (vs), 1632 (vs), 1518 (m), 1428 (s), 1376 (m), 1361 (s), 1224 (m), 1144 (w), 1105 (w), 854 (m), 806 (m), 793 (m), 724 (s), 655 (w), 548 (m), 435 (w), 415 (m), 396 (m).

Anal. Calcd for  $C_{41}H_{28}ZnCrN_6O_{12}$ ;  $Zn_2Cr_2$  (5): C, 53.87; H, 3.11; N, 9.26. Found: C, 54.21; H, 3.22; N, 9.56%.

IR (KBr,  $cm^{-1}$ ): 3442 (vs, br), 3058 (w), 2922 (M), 1715 (vs), 1705 (vs), 1680 (vs), 1642 (vs), 1517 (m), 1427 (s), 1383 (m), 1360 (s), 1224 (m), 1144 (w), 1104 (w), 855 (m), 807 (m), 793 (m), 725 (s), 642 (w), 549 (m), 438 (w), 413 (W), 393 (m).

**Table S2.** Selected absorption bands in the IR spectra of compounds 1–5

| Compound       | <i>bidentate oxalate group</i> |             |               | <i>bis(bidentate) oxalate group</i> |             |               |
|----------------|--------------------------------|-------------|---------------|-------------------------------------|-------------|---------------|
|                | $\nu_{as}(CO)$                 | $\nu_s(CO)$ | $\delta(OCO)$ | $\nu_{as}(CO)$                      | $\nu_s(CO)$ | $\delta(OCO)$ |
| $Mn_2Cr_2$ (1) | 1715, 1705, 1681               | 1376        | 806           | 1642                                | 1361        | 793           |
| $Co_2Cr_2$ (2) | 1715, 1705, 1681               | 1376        | 806           | 1642                                | 1361        | 793           |
| $Ni_2Cr_2$ (3) | 1714, 1705, 1681               | 1377        | 806           | 1639                                | 1361        | 799           |
| $Cu_2Cr_2$ (4) | 1715, 1704, 1680               | 1376        | 806           | 1632                                | 1361        | 793           |
| $Zn_2Cr_2$ (5) | 1715, 1705, 1680               | 1383        | 807           | 1642                                | 1360        | 793           |

**Table S3** Selected bond lengths (Å) and angles (°) for the  $[\{M(\text{phen})_2\}_2(\mu\text{-C}_2\text{O}_4)]^{2+}$  cations in compounds  $\text{Mn}_2\text{Cr}_2$  (**1**),  $\text{Co}_2\text{Cr}_2$  (**2**),  $\text{Cu}_2\text{Cr}_2$  (**4**) and  $\text{Zn}_2\text{Cr}_2$  (**5**)

|                    | $\text{Mn}_2\text{Cr}_2$ ( <b>1</b> ) | $\text{Co}_2\text{Cr}_2$ ( <b>2</b> ) | $\text{Cu}_2\text{Cr}_2$ ( <b>4</b> ) | $\text{Zn}_2\text{Cr}_2$ ( <b>5</b> ) |
|--------------------|---------------------------------------|---------------------------------------|---------------------------------------|---------------------------------------|
| M1–N1              | 2.240(5)                              | 2.125(3)                              | 2.023(4)                              | 2.138(3)                              |
| M1–N2              | 2.211(5)                              | 2.118(2)                              | 2.086(2)                              | 2.139(2)                              |
| M1–N3              | 2.231(6)                              | 2.126(3)                              | 2.021(3)                              | 2.134(3)                              |
| M1–N4              | 2.225(5)                              | 2.136(3)                              | 2.228(3)                              | 2.153(3)                              |
| M1–O1              | 2.135(4)                              | 2.093(2)                              | 2.032(3)                              | 2.084(2)                              |
| M1–O2 <sup>i</sup> | 2.168(4) <sup>b</sup>                 | 2.105(3) <sup>a</sup>                 | 2.270(3) <sup>b</sup>                 | 2.123(2) <sup>c</sup>                 |
| O1–M1–O2           | 77.43(15)                             | 79.42(7)                              | 77.21(9)                              | 79.38(8)                              |
| O1–M1–N1           | 94.89(16)                             | 96.01(10)                             | 94.29(11)                             | 94.71(10)                             |
| O1–M1–N2           | 161.30(14)                            | 166.74(9)                             | 165.64(9)                             | 165.62(9)                             |
| O1–M1–N3           | 94.82(15)                             | 90.96(10)                             | 91.47(10)                             | 93.27(10)                             |
| O1–M1–N4           | 99.39(17)                             | 96.66(8)                              | 97.23(10)                             | 96.65(9)                              |
| O2–M1–N1           | 99.86(17)                             | 94.93(10)                             | 94.55(11)                             | 96.35(11)                             |
| O2–M1–N2           | 88.82(17)                             | 89.01(8)                              | 89.77(9)                              | 88.94(9)                              |
| O2–M1–N3           | 92.73(17)                             | 93.95(10)                             | 94.15(10)                             | 93.29(10)                             |
| O2–M1–N4           | 166.70(17)                            | 171.20(9)                             | 170.94(9)                             | 169.91(10)                            |
| N1–M1–N2           | 74.82(17)                             | 78.39(10)                             | 80.57(11)                             | 78.13(11)                             |
| N1–M1–N3           | 165.52(17)                            | 169.58(10)                            | 170.44(11)                            | 168.37(10)                            |
| N1–M1–N4           | 93.3(2)                               | 93.31(11)                             | 92.98(12)                             | 93.20(11)                             |
| N2–M1–N3           | 98.48(17)                             | 96.34(10)                             | 95.54(11)                             | 95.81(11)                             |
| N2–M1–N4           | 96.80(18)                             | 95.67(9)                              | 96.43(10)                             | 96.20(10)                             |
| N3–M1–N4           | 74.6(2)                               | 78.16(11)                             | 78.72(11)                             | 77.46(11)                             |

<sup>a</sup> Symmetry operator (*i*) 2 – *x*, – *y*, 1 – *z*. <sup>b</sup> Symmetry operator: *i*) 1 – *x*, – *y*, 2 – *z*. <sup>c</sup> Symmetry operator: *i*) 1 – *x*, 2 – *y*, 1 – *z*.

**Table S4** Selected bond lengths (Å) and angles (°) for the  $[\text{Cr}(\text{phen})(\text{C}_2\text{O}_4)_2]^-$  anions in compounds  $\text{Mn}_2\text{Cr}_2$  (**1**),  $\text{Co}_2\text{Cr}_2$  (**2**),  $\text{Cu}_2\text{Cr}_2$  (**4**) and  $\text{Zn}_2\text{Cr}_2$  (**5**)

|            | $\text{Mn}_2\text{Cr}_2$ ( <b>1</b> ) | $\text{Co}_2\text{Cr}_2$ ( <b>2</b> ) | $\text{Cu}_2\text{Cr}_2$ ( <b>4</b> ) | $\text{Zn}_2\text{Cr}_2$ ( <b>5</b> ) |
|------------|---------------------------------------|---------------------------------------|---------------------------------------|---------------------------------------|
| Cr1–N5     | 2.066(4)                              | 2.076(2)                              | 2.074(3)                              | 2.077(2)                              |
| Cr1–N6     | 2.080(5)                              | 2.079(3)                              | 2.078(3)                              | 2.085(3)                              |
| Cr1–O3     | 1.953(5)                              | 1.952(2)                              | 1.956(3)                              | 1.952(2)                              |
| Cr1–O6     | 1.945(4)                              | 1.961(3)                              | 1.960(2)                              | 1.961(3)                              |
| Cr1–O7     | 1.951(4)                              | 1.946(2)                              | 1.950(2)                              | 1.952(2)                              |
| Cr1–O10    | 1.939(4)                              | 1.951(3)                              | 1.949(2)                              | 1.954(3)                              |
| O3–Cr1–O6  | 82.63(16)                             | 82.69(9)                              | 82.71(9)                              | 82.67(9)                              |
| O3–Cr1–O7  | 96.68(15)                             | 96.06(10)                             | 96.16(10)                             | 95.81(10)                             |
| O3–Cr1–O10 | 95.09(17)                             | 95.09(10)                             | 94.98(10)                             | 94.96(10)                             |
| O3–Cr1–N5  | 91.89(15)                             | 92.05(9)                              | 92.02(9)                              | 92.15(9)                              |
| O3–Cr1–N6  | 169.17(16)                            | 168.81(10)                            | 168.91(10)                            | 169.10(9)                             |
| O6–Cr1–O7  | 93.29(17)                             | 93.95(10)                             | 93.50(10)                             | 93.96(10)                             |
| O6–Cr1–O10 | 176.11(13)                            | 176.05(9)                             | 175.75(9)                             | 175.77(9)                             |
| O6–Cr1–N5  | 93.62(16)                             | 93.82(9)                              | 94.17(9)                              | 93.80(9)                              |
| O6–Cr1–N6  | 90.81(16)                             | 89.93(9)                              | 90.12(9)                              | 90.20(9)                              |
| O7–Cr1–O10 | 83.83(16)                             | 83.01(9)                              | 83.18(9)                              | 82.77(9)                              |
| O7–Cr1–N5  | 169.62(15)                            | 169.41(10)                            | 169.43(9)                             | 169.52(10)                            |
| O7–Cr1–N6  | 92.28(15)                             | 92.82(10)                             | 92.71(10)                             | 92.88(10)                             |
| O10–Cr1–N5 | 89.59(16)                             | 89.52(9)                              | 89.47(9)                              | 89.78(9)                              |
| O10–Cr1–N6 | 91.91(16)                             | 92.73(10)                             | 92.68(10)                             | 92.64(10)                             |
| N5–Cr1–N6  | 79.89(15)                             | 80.01(10)                             | 80.02(9)                              | 80.07(9)                              |

**Table S5** Geometric parameters of the aromatic stacking interactions for compounds Mn<sub>2</sub>Cr<sub>2</sub> (**1**), Co<sub>2</sub>Cr<sub>2</sub> (**2**), Cu<sub>2</sub>Cr<sub>2</sub> (**4**) and Zn<sub>2</sub>Cr<sub>2</sub> (**5**)

| Compound                                     | Cg( <i>i</i> )⋯Cg( <i>j</i> ) | Cg( <i>i</i> )⋯Cg( <i>j</i> )/Å <sup>a</sup> | $\alpha$ /° <sup>b</sup> | $\beta$ /° <sup>c</sup> | Cg( <i>i</i> )⋯plane<br>[Cg( <i>j</i> )]/Å <sup>d</sup> | Symmetry operator   |
|----------------------------------------------|-------------------------------|----------------------------------------------|--------------------------|-------------------------|---------------------------------------------------------|---------------------|
| Mn <sub>2</sub> Cr <sub>2</sub> ( <b>1</b> ) | (N2→C11)⋯(N2→C11)             | 3.610(5)                                     | 0                        | 19.0                    | 3.414(2)                                                | 1 - x, -y, 1 - z    |
|                                              | (N6→C35)⋯(C4→C12)             | 3.773(6)                                     | 19.0(3)                  | 7.8                     | 3.737(2)                                                | x, -1 + y, z        |
|                                              | (N5→C36)⋯(C28→C36)            | 3.589(5)                                     | 2.8(2)                   | 20.4                    | 3.3646(19)                                              | 1 - x, 1 - y, 2 - z |
|                                              | (C28→C36)⋯(C28→C36)           | 3.670(5)                                     | 0                        | 23.0                    | 3.3785(19)                                              | 1 - x, 1 - y, 2 - z |
| Co <sub>2</sub> Cr <sub>2</sub> ( <b>2</b> ) | (N2→C11)⋯(N2→C11)             | 3.646(2)                                     | 0.03(18)                 | 18.6                    | 3.4562(15)                                              | 2 - x, 1 - y, 1 - z |
|                                              | (N6→C35)⋯(C4→C12)             | 3.795(2)                                     | 17.6(2)                  | 22.5                    | 3.7294(14)                                              | 2 - x, 1 - y, 1 - z |
|                                              | (N5→C36)⋯(C28→C36)            | 3.674(2)                                     | 3.07(16)                 | 23.8                    | 3.3612(13)                                              | 2 - x, 2 - y, -z    |
|                                              | (C28→C36)⋯(C28→C36)           | 3.6527(19)                                   | 0.03(16)                 | 20.1                    | 3.4298(14)                                              | 2 - x, 2 - y, -z    |
| Cu <sub>2</sub> Cr <sub>2</sub> ( <b>4</b> ) | (N2→C11)⋯(N2→C11)             | 3.661(3)                                     | 0                        | 18.1                    | 3.4790(15)                                              | 1 - x, -y, 1 - z    |
|                                              | (N6→C35)⋯(C4→C12)             | 3.795(3)                                     | 17.1(2)                  | 23.3                    | 3.7169(13)                                              | x, 1 + y, z         |
|                                              | (N5→C36)⋯(C28→C36)            | 3.680(2)                                     | 3.06(14)                 | 21.1                    | 3.3688(12)                                              | 1 - x, 1 - y, 2 - z |
|                                              | (C28→C36)⋯(C28→C36)           | 3.647(2)                                     | 0.00                     | 19.6                    | 3.4364(11)                                              | 1 - x, 1 - y, 2 - z |
| Zn <sub>2</sub> Cr <sub>2</sub> ( <b>5</b> ) | (N2→C11)⋯(N2→C11)             | 3.672(3)                                     | 0.00(19)                 | 18.9                    | 3.4753(16)                                              | 1 - x, 1 - y, 1 - z |
|                                              | (N6→C35)⋯(C4→C12)             | 3.776(3)                                     | 16.2(2)                  | 22.1                    | 3.7036(13)                                              | x, y, z             |
|                                              | (N5→C36)⋯(C28→C36)            | 3.676(2)                                     | 2.99(14)                 | 21.2                    | 3.3630(12)                                              | 1 - x, 2 - y, -z    |
|                                              | (C28→C36)⋯(C28→C36)           | 3.656(2)                                     | 0.00(13)                 | 20.3                    | 3.4291(12)                                              | 1 - x, 2 - y, -z    |

<sup>a</sup> Cg = centre of gravity of the aromatic ring. <sup>b</sup>  $\alpha$  = angle between the planes of two aromatic rings. <sup>c</sup>  $\beta$  = angle between the Cg⋯Cg line and the normal to the plane of the first aromatic ring.

**Table S6** Hydrogen-bonding geometry in compounds Mn<sub>2</sub>Cr<sub>2</sub> (**1**), Co<sub>2</sub>Cr<sub>2</sub> (**2**), Cu<sub>2</sub>Cr<sub>2</sub> (**4**) and Zn<sub>2</sub>Cr<sub>2</sub> (**5**). Interatomic distances involving the water molecules without located hydrogen atoms are given. For the disordered water molecules only position 'A' is included.

| Compound                                     | <i>D</i> -H... <i>A</i> | <i>D</i> -H/Å | H... <i>A</i> /Å | <i>D</i> ... <i>A</i> /Å | <i>D</i> -H... <i>A</i> /° | Symm. op. on <i>A</i>        |
|----------------------------------------------|-------------------------|---------------|------------------|--------------------------|----------------------------|------------------------------|
| Mn <sub>2</sub> Cr <sub>2</sub> ( <b>1</b> ) | O11-H11A...O5           | 0.85(12)      | 2.03(13)         | 2.877(9)                 | 176(18)                    | <i>x, y, z</i>               |
|                                              | O11-H11B...O8           | 0.85(8)       | 2.07(9)          | 2.904(10)                | 169(10)                    | <i>2 - x, 1 - y, 2 - z</i>   |
|                                              | O12A...O9               |               |                  | 2.993(16)                |                            | <i>2 - x, 1 - y, 1 - z</i>   |
|                                              | O12A...O3               |               |                  | 3.133(16)                |                            | <i>x, y, z</i>               |
| Co <sub>2</sub> Cr <sub>2</sub> ( <b>2</b> ) | O11-H11A...O8           | 0.86(10)      | 2.15(6)          | 2.975(6)                 | 160(13)                    | <i>2 - x, 1 - y, 1 - z</i>   |
|                                              | O11-H11B...O5           | 0.87(11)      | 2.18(13)         | 2.903(7)                 | 141(15)                    | <i>-1 + x, -1 + y, 1 + z</i> |
|                                              | O12A-H12A...O9          | 0.9(2)        | 1.97(16)         | 2.824(15)                | 177(1)                     | <i>3 - x, 1 - y, - z</i>     |
|                                              | O12A-H12B...O3          | 0.9(2)        | 2.6(2)           | 3.055(14)                | 150(1)                     | <i>x, y, z</i>               |
| Cu <sub>2</sub> Cr <sub>2</sub> ( <b>4</b> ) | O11-H11A...O5           | 0.85(18)      | 2.1(2)           | 2.896(6)                 | 164(1)                     | <i>x, y, z</i>               |
|                                              | O11-H11B...O8           | 0.86(13)      | 2.15(14)         | 2.957(7)                 | 157(1)                     | <i>2 - x, 1 - y, 2 - z</i>   |
|                                              | O12A...O9               |               |                  | 2.833(8)                 |                            | <i>2 - x, 1 - y, 1 - z</i>   |
|                                              | O12A...O3               |               |                  | 3.081(8)                 |                            | <i>x, y, z</i>               |
| Zn <sub>2</sub> Cr <sub>2</sub> ( <b>5</b> ) | O11-H11A...O5           | 0.87(10)      | 2.40(13)         | 2.899(8)                 | 117(8)                     | <i>1 - x, 2 - y, -z</i>      |
|                                              | O11-H11B...O8           | 0.86(8)       | 2.11(7)          | 2.926(7)                 | 158(13)                    | <i>-1 + x, y, z</i>          |
|                                              | O12a...O9               |               |                  | 2.876(11)                |                            | <i>2 - x, 1 - y, 1 - z</i>   |
|                                              | O12a...O3               |               |                  | 3.026(11)                |                            | <i>x, y, 1 + z</i>           |
